# Supplementary material for: The Shigella kinase effector OspG modulates host ubiquitin signaling to escape septin-cage entrapment
Source: PubMed Central journal article supplement (PMC11078946; doi:10.1038/s41467-024-48205-4), 2024-05-08
Supplement: 41467_2024_48205_MOESM1_ESM.pdf [file 41467_2024_48205_MOESM1_ESM.pdf]

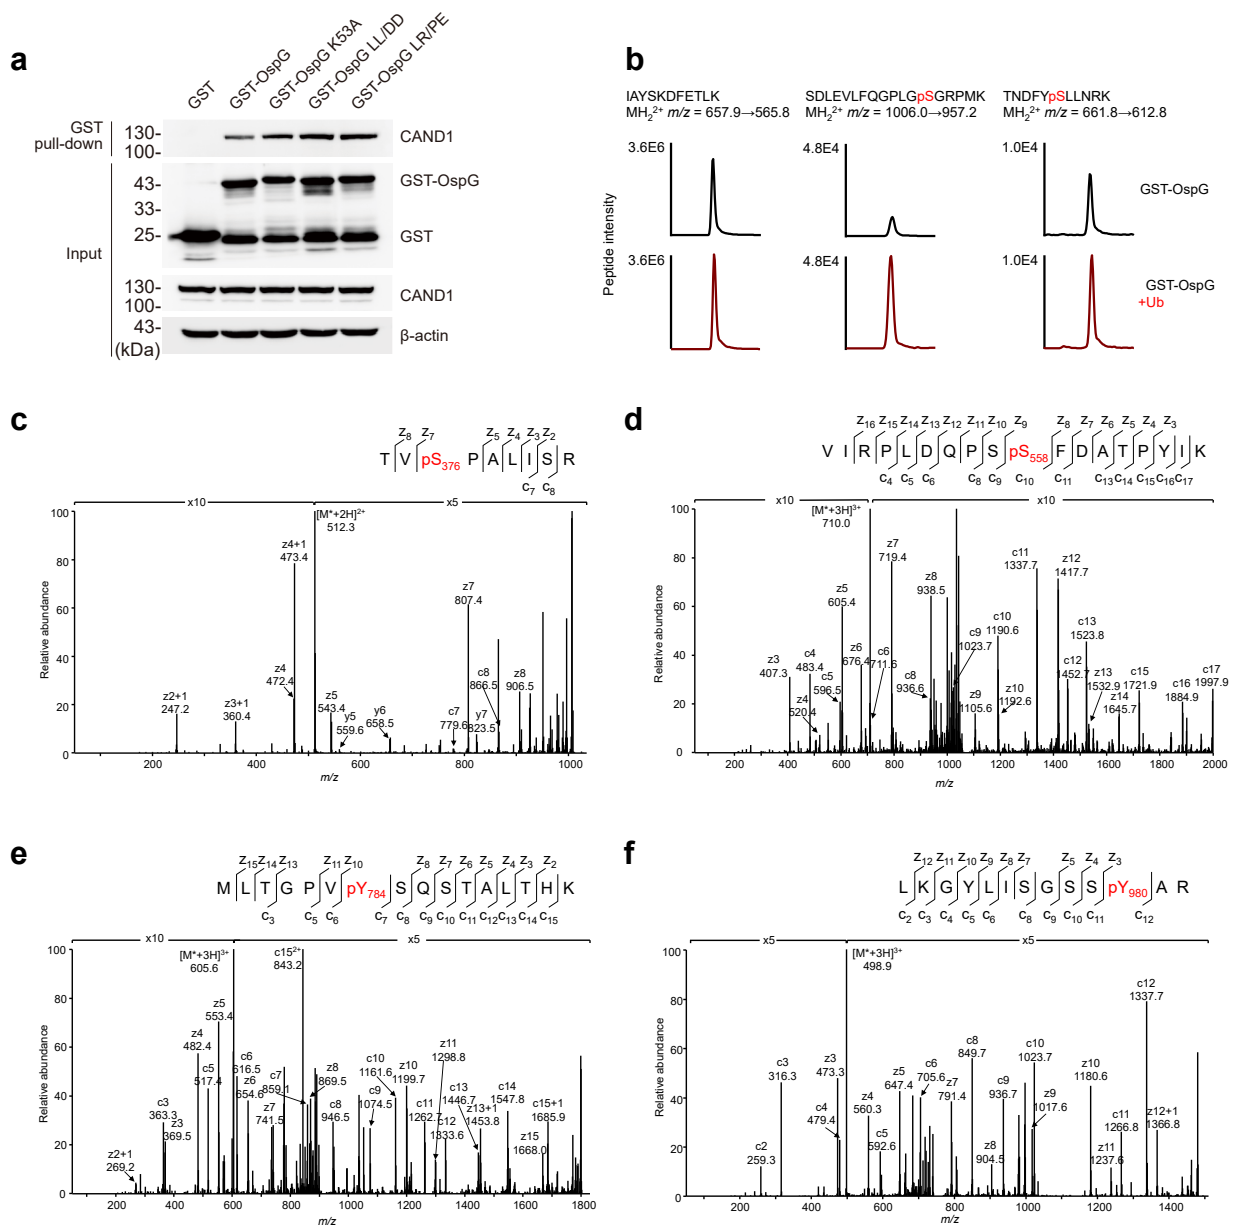

**Supplementary Fig. 1 CAND1 is a kinase substrate of OspG.** | (a) GST pull-down analyses of CAND1 association with OspG or the indicated variants. Glutathione resins coated with GST-OspG or GST alone were incubated with 293T cell lysates. Eluted samples were blotted with anti-CAND1 and anti-GST antibodies. Images are representative of  $n = 2$  independent experiments. (b) Ub binding stimulates the autophosphorylation of OspG. Purified GST-OspG protein was incubated with ATP with or without the addition of Ub *in vitro*. The samples were subjected to SDS-PAGE separation and subsequent SRM analysis. Extracted ion chromatograms of phosphorylation containing peptides (SDLEVLFGQPLGSGRPMK, TNDFYpSLLNRK) and a control peptide (IAYSKDFETLK) of GST-OspG are shown. (c-f) Electron transfer dissociation (ETD)-tandem mass spectra of CAND1 peptides bearing phosphorylation at Ser376, Ser558, Tyr784, Tyr980.

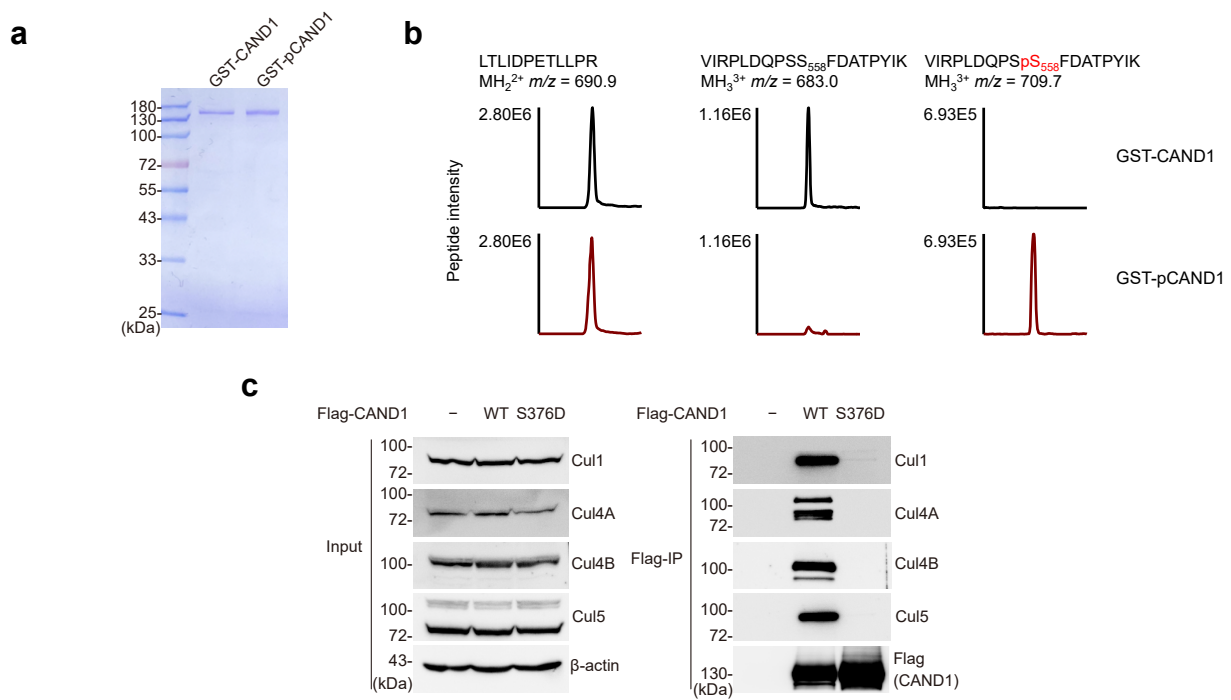

**Supplementary Fig. 2 OspG-catalyzed phosphorylation of CAND1 disrupts its interactions with cullins.**

| (a) Coomassie blue staining of purified GST-CAND1 and GST-pCAND1 used in this study. (b) Extracted ion chromatograms of a control peptide (LTLIDPETLLPR), the Ser558-phosphorylated peptide (VIRPLDQP-SpS<sub>558</sub>FDATPYIK) as well as its unmodified form (VIRPLDQPSSFDATPYIK) of recombinant GST-CAND1 or GST-pCAND1 purified from *E. coli*. Compared with the control group, the unmodified peptide was barely detected in pCAND1, indicating a high rate of protein modification (close to 100%). (c) 293T cells were transfected with Flag-CAND1 or Flag-CAND1 S376D, and immunoprecipitated CAND1 samples were probed with indicated antibodies to assess CAND1-cullin interactions. Images are representative of  $n = 3$  independent experiments.

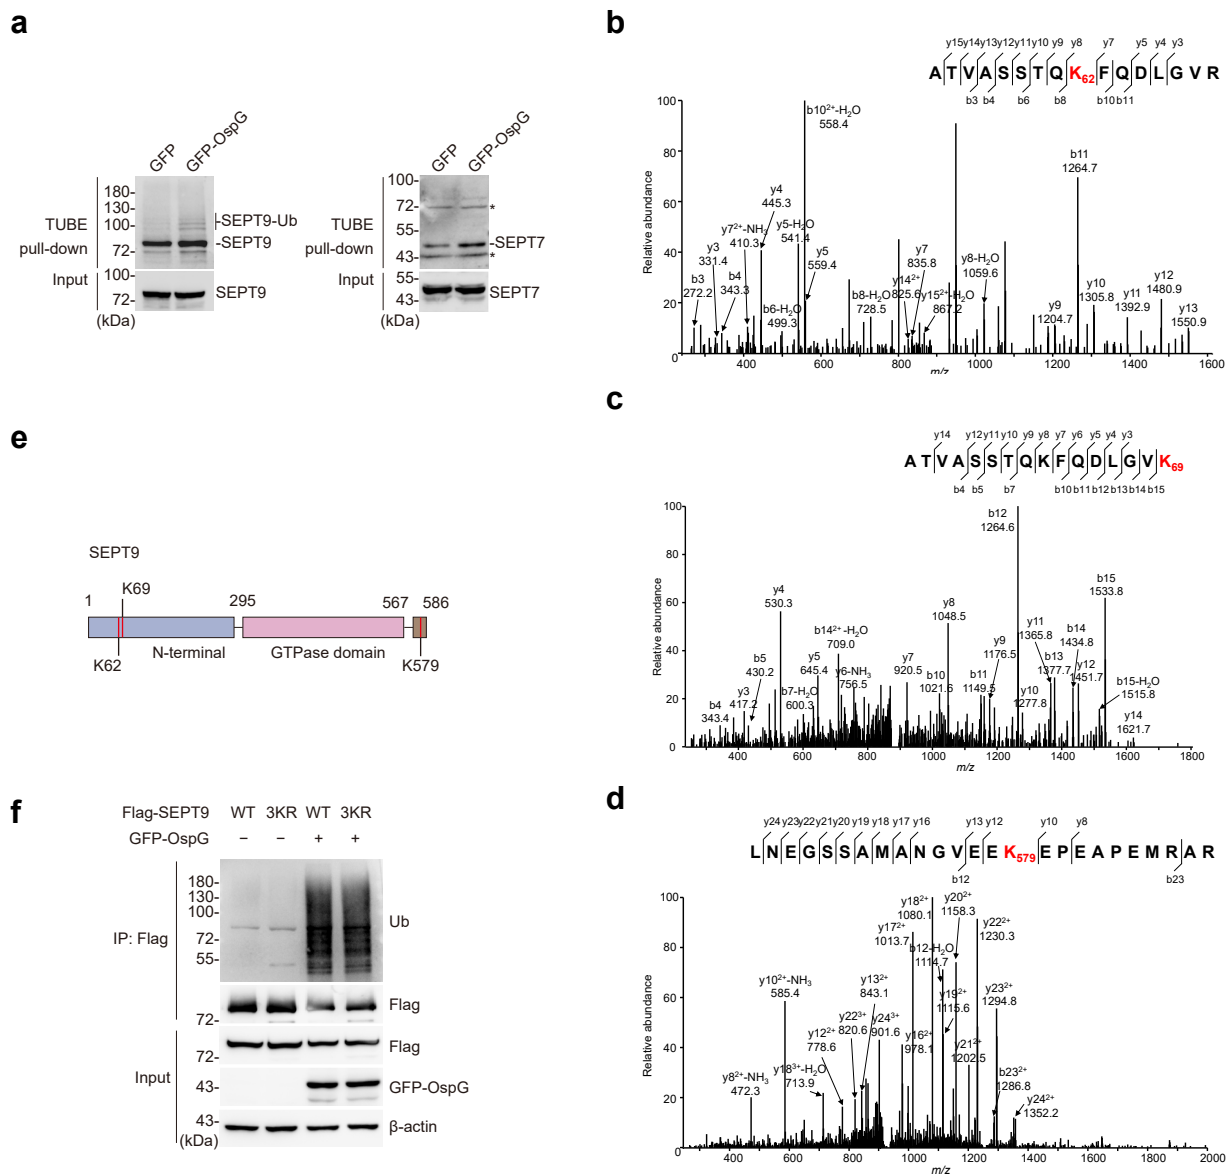

**Supplementary Fig. 3 The septin family proteins exhibit elevated ubiquitination levels in an OspG-dependent manner.** | (a) Immunoblots of TUBE-captured cell extracts showing the signals of SEPT9 or SEPT7 together with their ubiquitinated forms in OspG-expressing or control cells. \*, nonspecific bands. Images are representative of  $n = 2$  independent experiments. (b-d) CID-tandem mass spectra of SEPT9 peptides bearing di-glycine residues at Lys62, Lys69, and Lys579. (e) Ubiquitination sites of SEPT9 identified by LC-MS analysis. (f) Ubiquitination levels of SEPT9 (WT or 3KR) in 293T cells co-expressing GFP-OspG. Lysates were immunoprecipitated with Flag antibody and immunoblotted as indicated. 3KR denotes a SEPT9 mutant in which all three lysine (K62, K69, K579) residues were replaced with arginine. Images are representative of  $n = 2$  independent experiments.

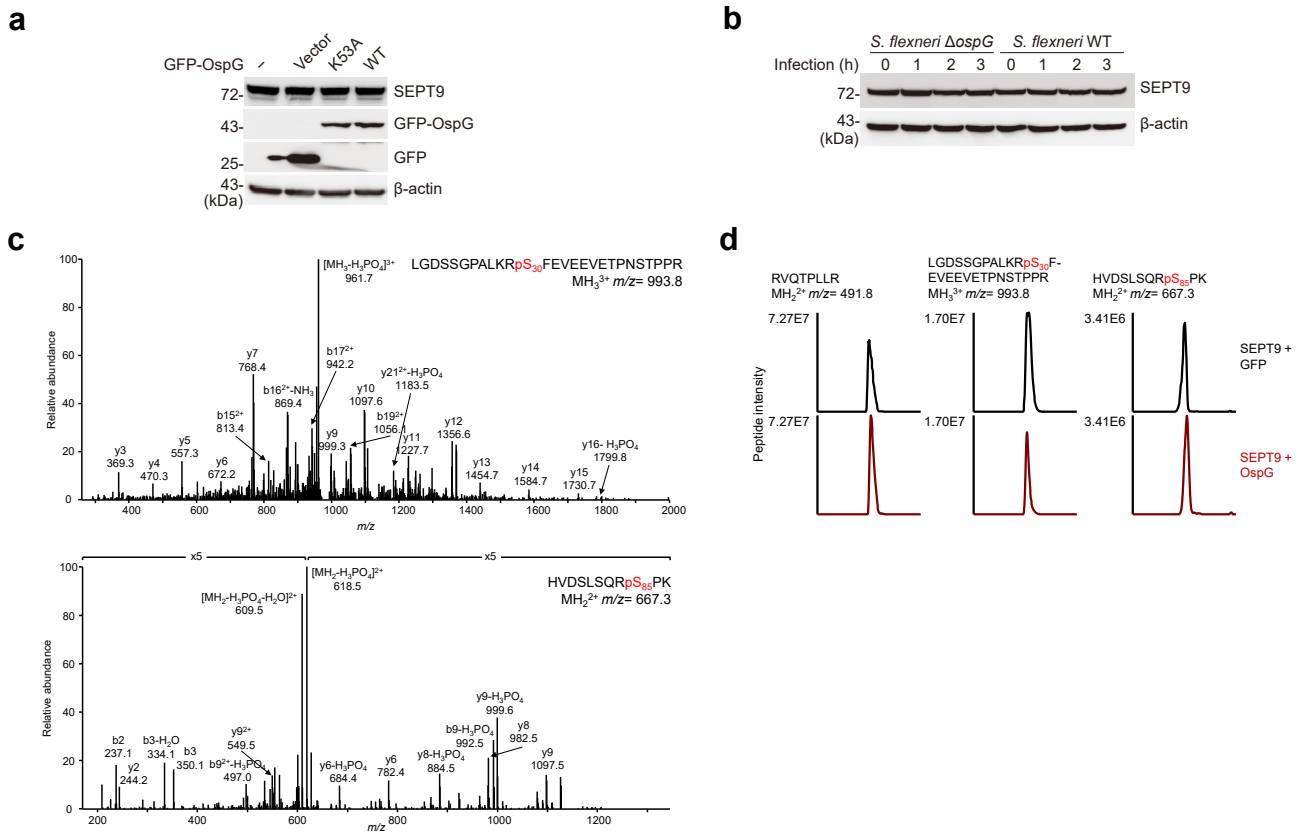

**Supplementary Fig. 4 Septin family proteins undergo increased ubiquitination with mixed types of Ub chains.** | (a) Untransfected 293T cells or those transfected with GFP, GFP-OspG or GFP-OspG K53A for 24 h were lysed and immunoblotted with indicated antibodies. Images are representative of  $n = 3$  independent experiments. (b) Immunoblots of lysate samples from HeLa cells infected with *S. flexneri* strains as indicated. Images are representative of  $n = 3$  independent experiments. (c) CID-tandem mass spectra of phosphorylated SEPT9 peptides at Ser30, and Ser85. (d) Extracted ion chromatograms of phosphorylated peptides at Ser30 (LGDSSGPALKRSFEVEEVETPNSTPPR), Ser85 (HVDSLSQRSPK) and a control peptide (RVQTPLLR) of SEPT9. 293T cells were co-transfected with Flag-SEPT9 and OspG or GFP, and immunoprecipitated SEPT9 samples were resolved by SDS-PAGE before LC-MS analysis.

**a**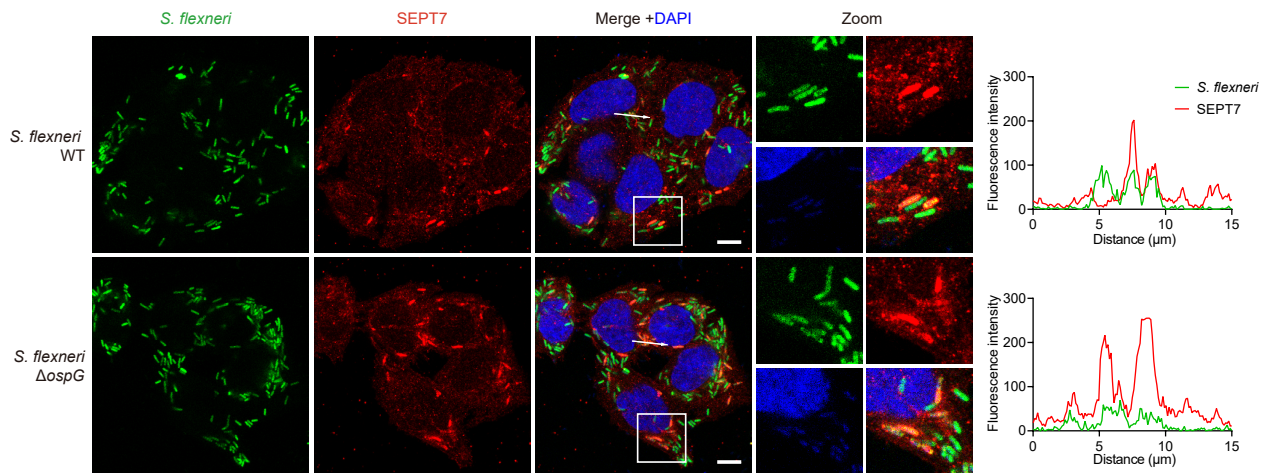**b**

| Protein | Mass (kDa) | Spectral counts |         |                    |                    |                    |                    |
|---------|------------|-----------------|---------|--------------------|--------------------|--------------------|--------------------|
|         |            | WT rep1         | WT rep2 | $\Delta ospG$ rep1 | $\Delta ospG$ rep2 | $\Delta mxIE$ rep1 | $\Delta mxIE$ rep2 |
| LolA    | 22.5       | 42              | 43      | 36                 | 41                 | 41                 | 41                 |
| MxiE    | 24.5       | 27              | 26      | 31                 | 32                 | 0                  | 0                  |
| OspG    | 22.6       | 16              | 10      | 0                  | 0                  | 10                 | 6                  |

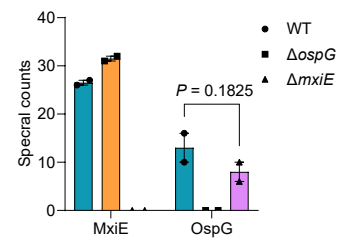

**Supplementary Fig. 5 | (a)** Representative immunofluorescence images of *S. flexneri*-infected cells. HeLa cells were infected with indicated GFP-labelled *S. flexneri* strains for 2 h, fixed and stained with an anti-SEPT7 antibody. Nuclei were stained with DAPI. Fluorescence intensity was plotted along the arrows. Scale bars, 10  $\mu\text{m}$ . **(b)** Proteomics analysis of *S. flexneri* WT,  $\Delta ospG$  and  $\Delta mxIE$  strains, the outer-membrane lipoprotein carrier protein (LolA) was used as a control. Data are from  $n = 2$  independent experiments. Unpaired two-sided Student's *t*-test was performed for statistical analysis.

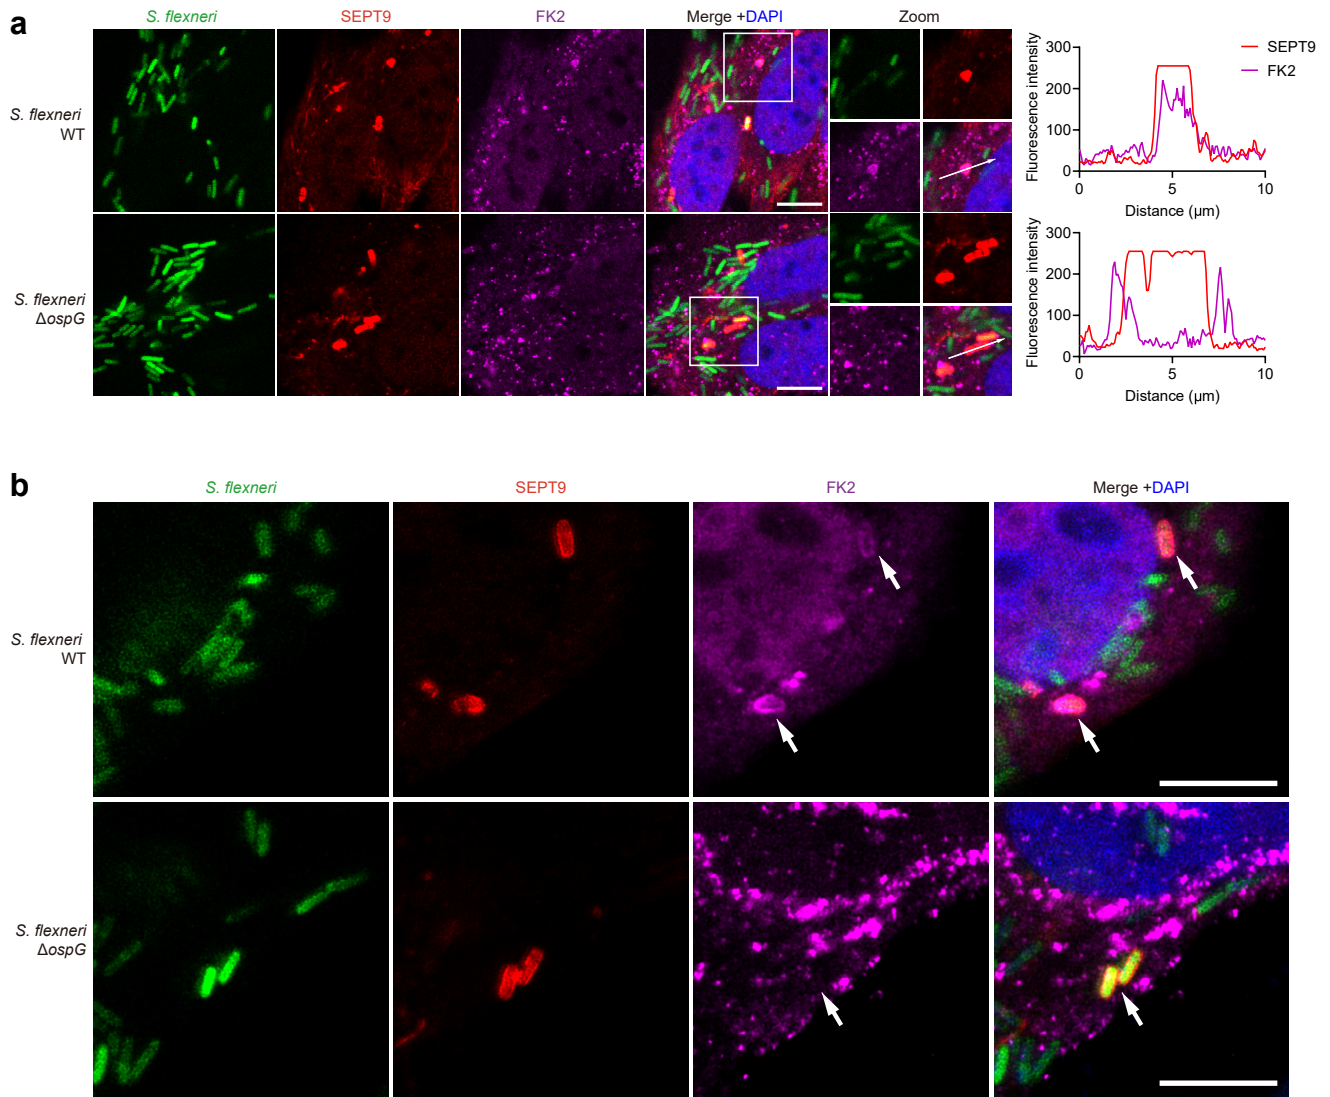

**Supplementary Fig. 6 OspG-promoted ubiquitination of septins prevents the assembly of septin-cages around cytosolic *S. flexneri* in infected host cells.** | (a) Immunofluorescence images of *S. flexneri*-infected cells. HeLa cells were infected with indicated GFP-labelled *S. flexneri* strains for 2 h, fixed and stained with anti-SEPT9 and FK2 antibodies. Nuclei were stained with DAPI. Fluorescence intensity was plotted along the arrows. Scale bars, 10  $\mu\text{m}$ . Images are representative of  $n = 2$  independent experiments. (b) Immunofluorescence images of *S. flexneri*-infected cells. HeLa cells were infected with indicated GFP-labelled *S. flexneri* strains for 2 h, fixed and stained with anti-SEPT9 and FK2 antibodies. Nuclei were stained with DAPI. For higher magnification, the Lightning 3D deconvolution method was used for image acquisition. Scale bars, 10  $\mu\text{m}$ . Images are representative of  $n = 2$  independent experiments.
