# Supplementary material for: The Shigella kinase effector OspG modulates host ubiquitin signaling to escape septin-cage entrapment
Source: PubMed Central journal article supplement (PMC11078946; doi:10.1038/s41467-024-48205-4), 2024-05-08
Supplement: 41467_2024_48205_MOESM3_ESM.pdf [file 41467_2024_48205_MOESM3_ESM.pdf]

## **Description of Additional Supplementary Files**

File Name: Supplementary Data 1  
Description: OspG phosphoproteomics

File Name: Supplementary Data 2  
Description: GST-CAND1 pull-down

File Name: Supplementary Data 3  
Description: Ubiquitome
